# Supplementary material for: A microenvironment-mediated Cu2O–MoS2nanoplatform with enhanced Fenton-like reaction activity for tumor chemodynamic/photothermal therapy
Source: Royal Society of Chemistry journal article supplement (doi:10.1039/d1nj01272j), 2021-01-01
Supplement: d1nj01272j1.pdf [file d1nj01272j1.pdf]

Electronic Supplementary Material (ESI) for New Journal of Chemistry.  
This journal is © The Royal Society of Chemistry and the Centre National de la Recherche Scientifique 2021

Supporting information

**Microenvironment-mediated Cu<sub>2</sub>O-MoS<sub>2</sub> nanoplatform with enhanced Fenton-like reaction activity for tumor Chemodynamic/photothermal therapy**

Guligena Pidamaimaiti,<sup>ab</sup> Xiaoyu Huang,<sup>b</sup> Kai Pang,<sup>\*c</sup> Zhi Su<sup>\*a</sup> and Fu Wang<sup>b</sup>

- 
- a. College of Chemistry and Chemical Engineering, Xinjiang Normal University, Xinjiang 830054, Urumqi, China. E-mail: suzhixj@sina.com
- b. School of Biomedical Engineering Shanghai Jiao Tong University, Shanghai 200240, China. E-mail: wangfu@sjtu.edu.cn
- c. School of Instrument Science and opto Electronics Engineering of Beijing Information Science & Technology University, Beijing 100192, China. E-mail: pangkai@bistu.edu.cn

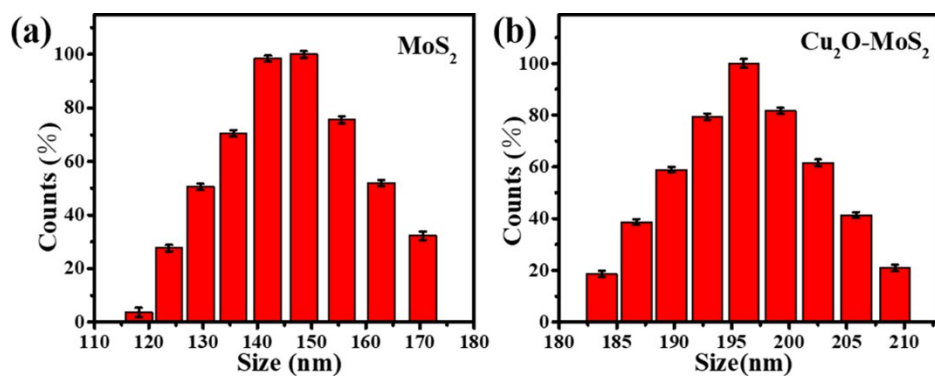

Fig S1. (a, b) Particle size distribution of MoS<sub>2</sub> and Cu<sub>2</sub>O-MoS<sub>2</sub>. (n = 3, mean ± SD).

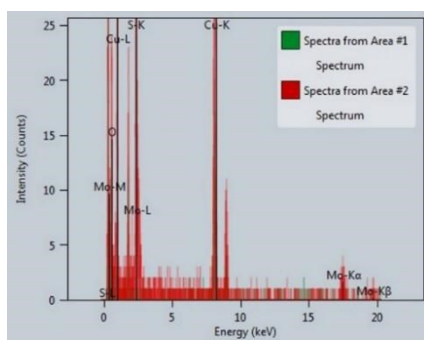

Fig S2. EDS spectrum of Cu<sub>2</sub>O-MoS<sub>2</sub>.

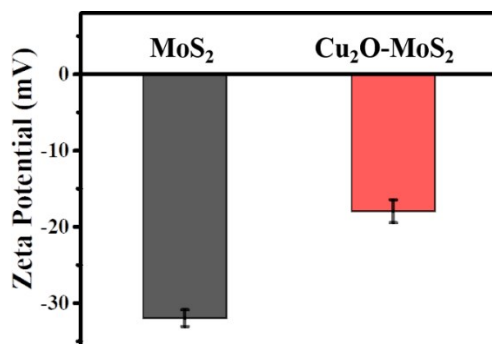

Fig S3. Zeta potential of MoS<sub>2</sub> and Cu<sub>2</sub>O-MoS<sub>2</sub>.

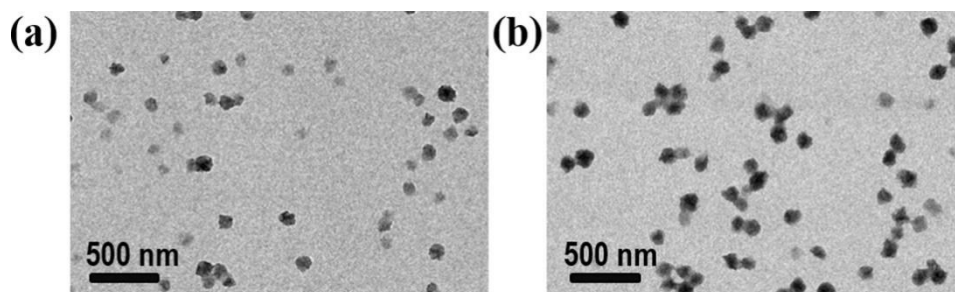

Fig S4. (a) Low-resolution TEM image of MoS<sub>2</sub>. (b) Low-resolution TEM image of Cu<sub>2</sub>O-MoS<sub>2</sub>.

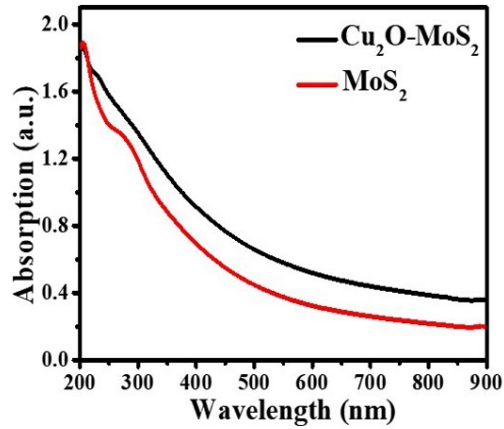

Fig S5. UV-vis absorption spectra of MoS<sub>2</sub> and Cu<sub>2</sub>O-MoS<sub>2</sub>.

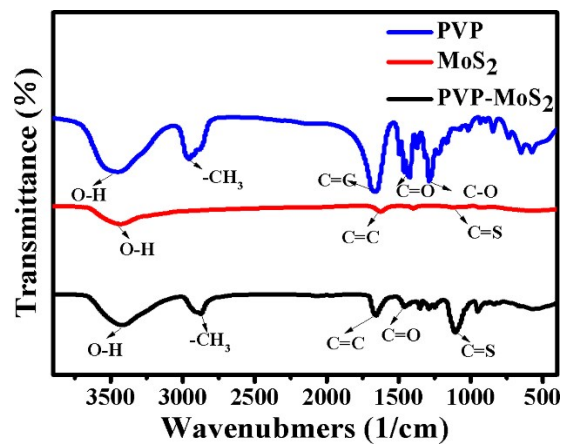

Fig S6. FT-IR spectra of PVP, MoS<sub>2</sub> and PVP-MoS<sub>2</sub>.

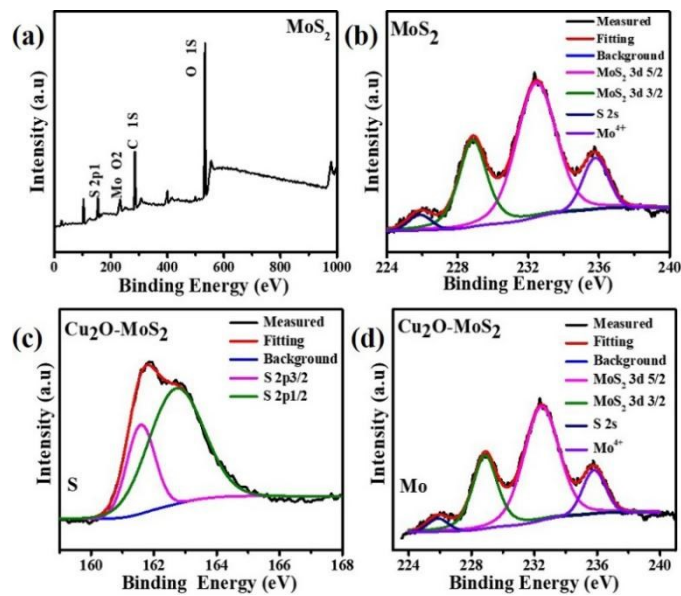

Fig S7. (a) XPS survey spectrum of MoS<sub>2</sub>. (b) High resolution of Mo XPS images of MoS<sub>2</sub>. (c) High resolution of S XPS images of Cu<sub>2</sub>O-MoS<sub>2</sub>. (d) High resolution of Mo XPS images of Cu<sub>2</sub>O-MoS<sub>2</sub>.

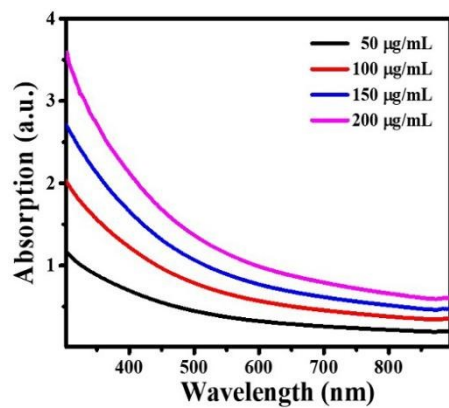

Fig S8. Cu<sub>2</sub>O-MoS<sub>2</sub> UV-vis absorption spectra of different concentrations.

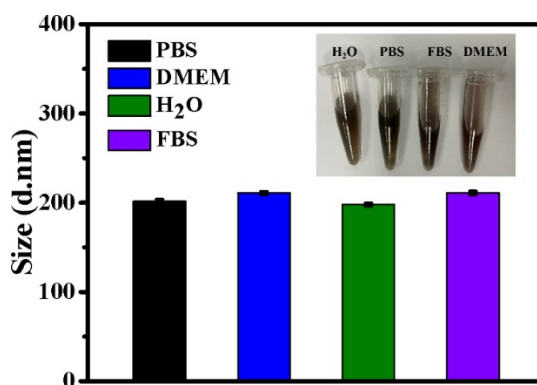

Fig S9. Photographs of Cu<sub>2</sub>O-MoS<sub>2</sub> incubated for 48 h under different physiological conditions.

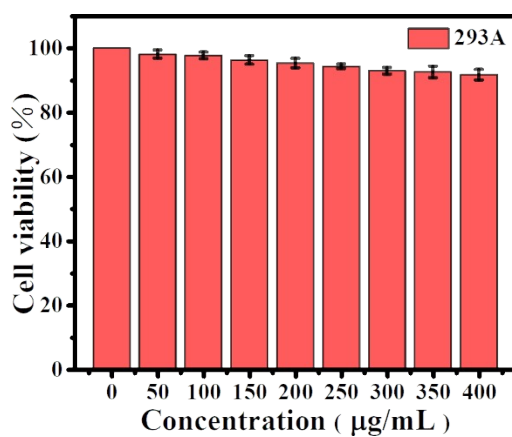

Fig S10. Cell viability of 293A cells exposed to Cu<sub>2</sub>O-MoS<sub>2</sub> at different concentrations.

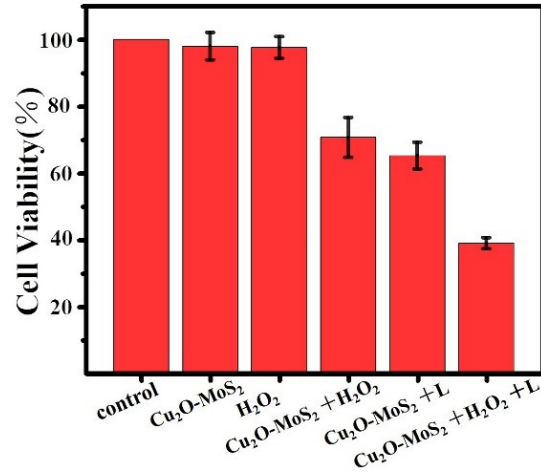

**Fig S11.** Toxicity of the same concentration of Cu<sub>2</sub>O-MoS<sub>2</sub> to 4T1 breast cancer cells under H<sub>2</sub>O<sub>2</sub> or irradiation.

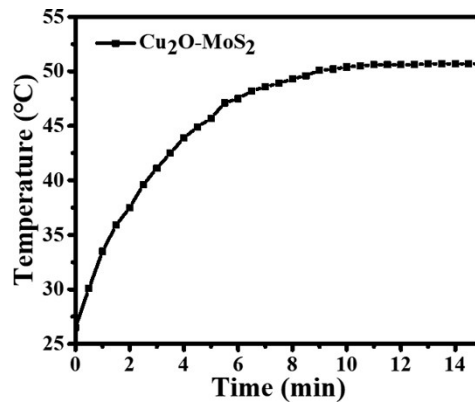

**Fig S12.** Temperature curves of Cu<sub>2</sub>O-MoS<sub>2</sub> aqueous solution under 808 nm laser.

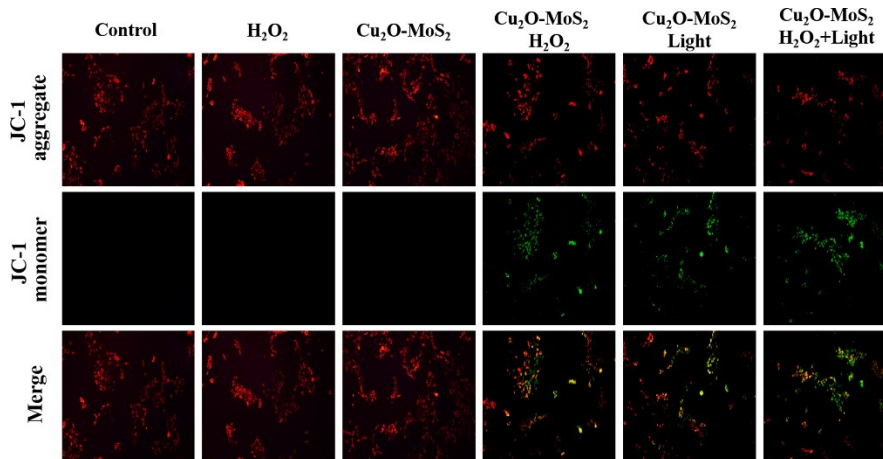

**Fig S13.** Fluorescence imaging of JC-1 stained 4T1 cells.
